# Supplementary material
Source: PubMed Central journal article supplement (PMC3794440)
Supplement: bi401057x_si_001.pdf [file bi401057x_si_001.pdf]

## Supplementary Material

### **Interdomain Interactions Support Interdomain Communication in Human Pin1**

Kimberly A. Wilson<sup>†</sup>, Jill J. Bouchard<sup>†</sup>, and Jeffrey W. Peng\*

Department of Chemistry and Biochemistry  
University of Notre Dame  
251 Nieuwland Science Hall  
Notre Dame, IN 46556

Four (4) Supplementary Figures, S1, S2, S3, and S4, on four separate pages below.

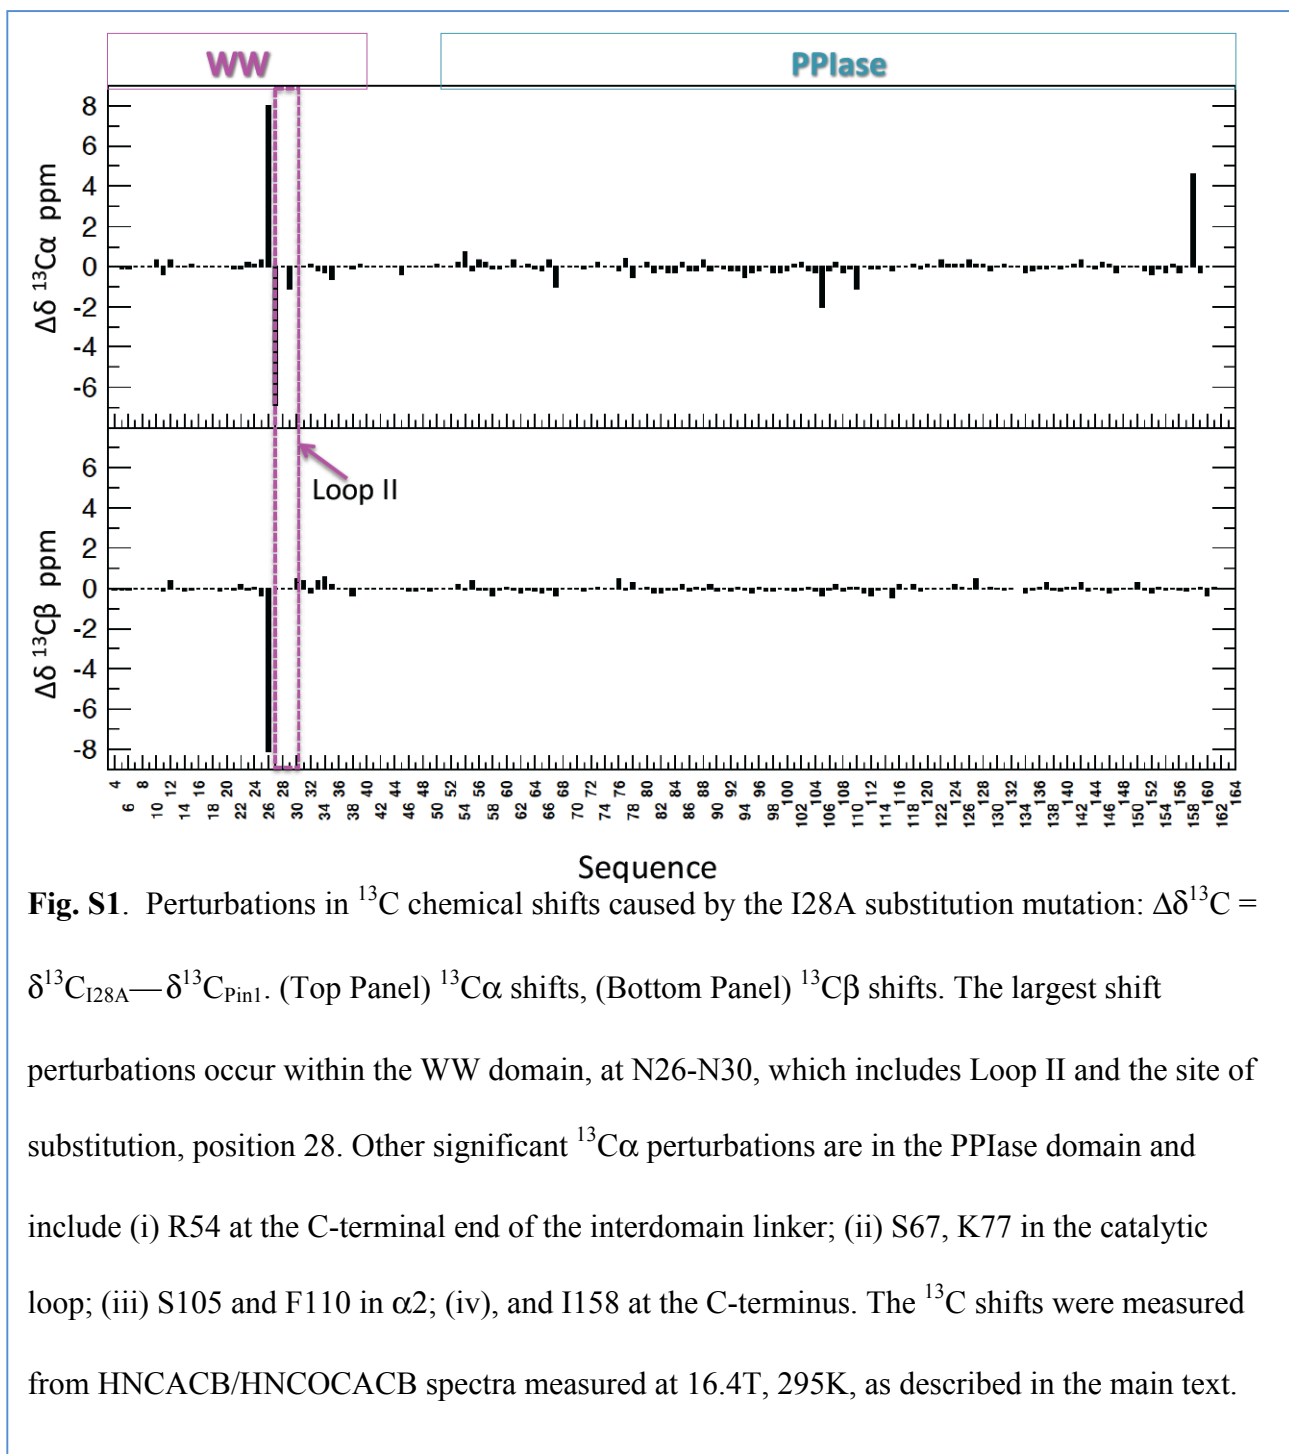

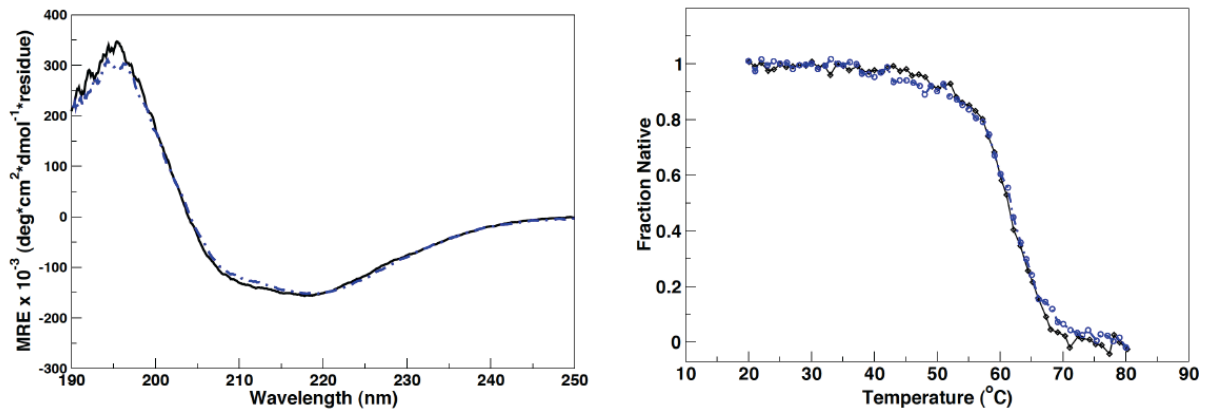

**Fig. S2.** (Left panel) Far-UV CD wave scans at 20 °C of WT Pin1 (black solid trace) and I28A (blue dashed-dotted trace). (Right panel) Thermal denaturation (monitored at 200 nm, WT Pin1 (black,  $T_{m, WT} = 62.5 \pm 0.2$  °C) and I28A (blue,  $T_{m, I28A} = 62.1 \pm 0.2$  °C). In both panels, the WT and I28A traces are nearly the same.

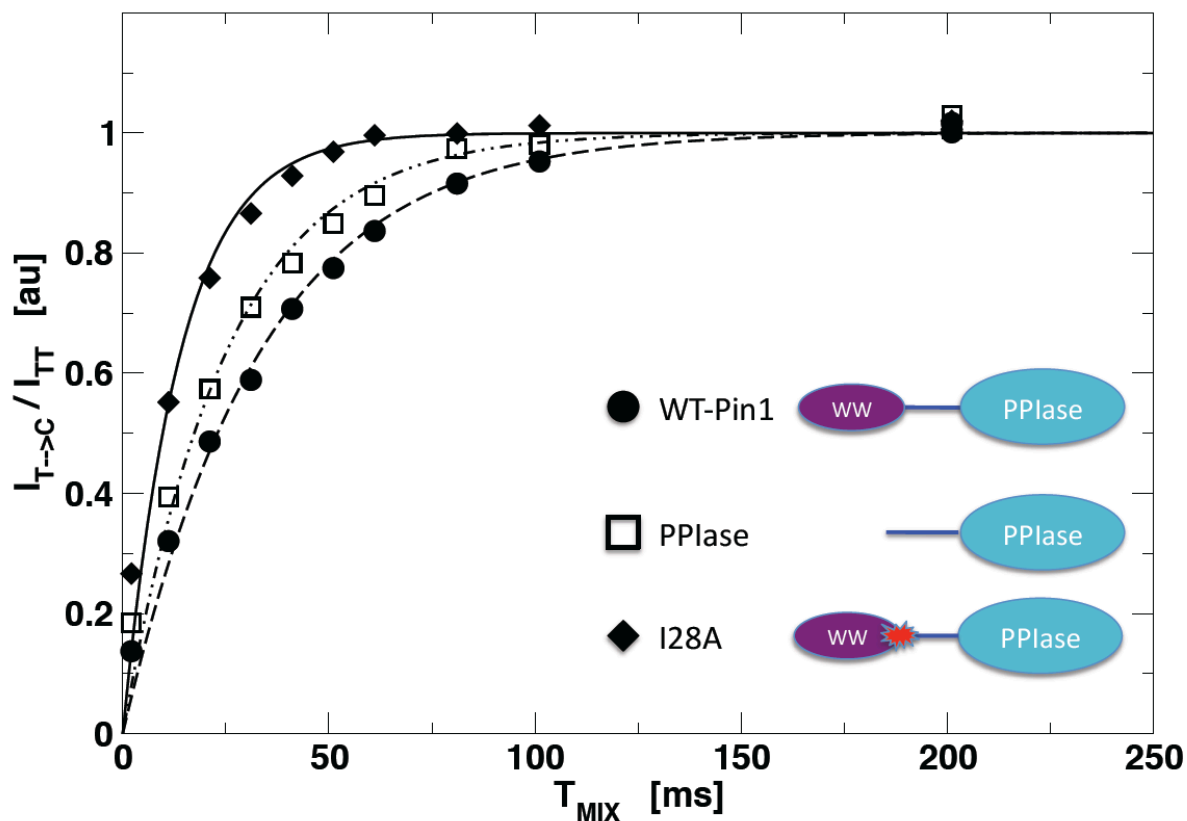

**Fig. S3.**  $^1\text{H}$ - $^1\text{H}$  EXSY build-up curves of pThr5 methyl protons of 2mM Cdc25C phosphopeptide in the presence of 50 $\mu\text{M}$  I28A, WT Pin1, or WT PPIase at 295K, 18.8 T, in buffer consisting of 30 mM  $\text{D}_4$ -imidazole (pH 6.6), 5 mM  $\text{D}_{10}$ -DTT, 30 mM NaCl, 0.03%  $\text{NaN}_3$ , and 90%  $\text{H}_2\text{O}$ /10%  $\text{D}_2\text{O}$ . The raw data and curve fits have been normalized with respect to the limiting plateau value at long  $T_{\text{mix}}$ . The vertical axis is the ratio of intensity of trans $\rightarrow$  cis exchange cross-peak ( $I_{\text{T}\rightarrow\text{C}}$ ), over that of the trans diagonal peak ( $I_{\text{TT}}$ ). Filled diamonds and black solid line are I28A ( $k_{\text{EXSY}} = 73 \pm 2 \text{ s}^{-1}$ ), open squares and dashed-dotted line are the isolated PPIase domain ( $k_{\text{EXSY}} = 41.4 \pm 1.0 \text{ s}^{-1}$ ), and filled circles and dashed line are WT full-length ( $k_{\text{EXSY}} = 31.3 \pm 0.5 \text{ s}^{-1}$ ).

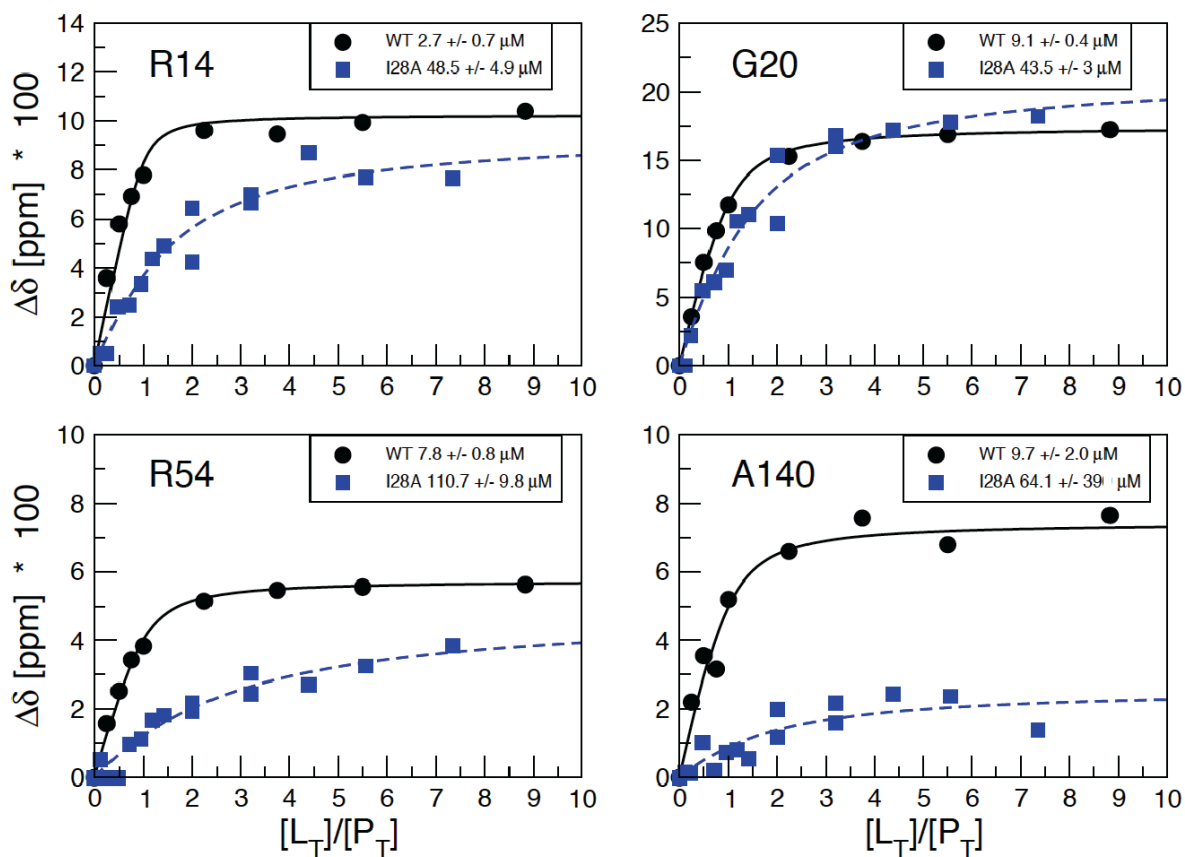

**Fig. S4.** Binding isotherms for residues in the WW domain (R14 and G20) and PPIase domain (R54 and A140) from  $^{15}\text{N}$ - $^1\text{H}$  chemical shifts perturbations at 295 K, 16.4T in buffer consisting of 30 mM  $\text{D}_4$ -imidazole (pH 6.6), 5 mM  $\text{D}_{10}$ -DTT, 30 mM NaCl, 0.03%  $\text{NaN}_3$ , and 90%  $\text{H}_2\text{O}/10\%$   $\text{D}_2\text{O}$ . The horizontal axis is the ratio of total Cdc25C phosphopeptide over total protein. WT isotherms are the black dots and solid lines, I28A isotherms are blue squares and dashes. Fitted  $K_d$  values are: R14  $K_d^{\text{WT}} = 2.7 \pm 0.7 \mu\text{M}$ ,  $K_d^{\text{I28A}} = 48.5 \pm 4.9 \mu\text{M}$ ; G20  $K_d^{\text{WT}} = 9.1 \pm 0.4 \mu\text{M}$ ,  $K_d^{\text{I28A}} = 43.5 \pm 3.0 \mu\text{M}$ ; R54  $K_d^{\text{WT}} = 7.8 \pm 0.8 \mu\text{M}$ ,  $K_d^{\text{I28A}} = 110.7 \pm 9.8 \mu\text{M}$ ; A140  $K_d^{\text{WT}} = 9.7 \pm 2.0 \mu\text{M}$ ,  $K_d^{\text{I28A}} = 64.1 \pm 39.0 \mu\text{M}$ .
